# Supplementary material for: The influence of alkyl side chains on molecular packing and solar cell performance of dithienopyrrole-based oligothiophenes
Source: Royal Society of Chemistry journal article supplement (doi:10.1039/c6ta03453e), 2016-01-01
Supplement: c6ta03453e1.pdf [file c6ta03453e1.pdf]

## Supporting Information

### The influence of alkyl side chains on molecular packing and solar cell performance of dithienopyrrole-based oligothiophenes

Gisela L. Schulz,<sup>a,d</sup> Prasenjit Kar,<sup>a,e</sup> Martin Weideler,<sup>a</sup> Astrid Vogt,<sup>a</sup> Marta Urdanpilleta,<sup>b</sup> Mika Lindén,<sup>c</sup> Elena Mena-Osteritz,<sup>a</sup> Amaresh Mishra<sup>a,f\*</sup> and Peter Bäuerle<sup>a\*</sup>

<sup>a</sup>*Institute of Organic Chemistry II and Advanced Materials, Ulm University, Albert-Einstein-Allee 11, 89081 Ulm, Germany*

<sup>b</sup>*Department of Applied Physics I, University of the Basque Country (UPV/EHU), Plaza de Europa, 1, 20018 Donostia, San Sebastián, Spain*

<sup>c</sup>*Institute of Inorganic Chemistry II, Ulm University, Albert-Einstein-Allee 11, 89081 Ulm, Germany*

<sup>d</sup>*Current address: Institute of Polymer Chemistry, University of Stuttgart, Pfaffenwaldring 55, 70569 Stuttgart, Germany*

<sup>e</sup>*Current address: Department of Chemistry, Indian Institute of Technology, Roorkee-247667, India*

<sup>f</sup>*Current address: School of Chemistry, Sambalpur University, Jyoti Vihar-768019, Sambalpur, India*

\*E-mail: amaresh.mishra@suniv.ac.in; peter.baeuerle@uni-ulm.de

**Synthesis:** All reactions were performed under an argon atmosphere in dry solvents. Compounds **8**,<sup>1,2</sup> **9**,<sup>3</sup> and **10**<sup>4</sup> were synthesized according to the literature procedures.

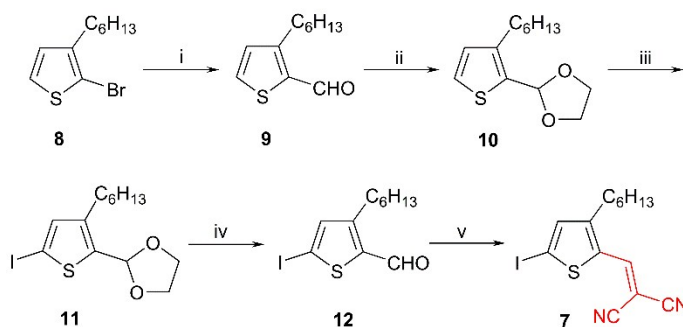

**Scheme S1.** (i) <sup>n</sup>BuLi-THF, DMF, -78 °C – 40 °C, 84%. (ii) C<sub>2</sub>H<sub>4</sub>(OH)<sub>2</sub>, p-TSA, toluene, reflux, 18 h, 95%. (iii) <sup>n</sup>BuLi-THF, I<sub>2</sub>, -78 °C – r.t., 15h, 82%. (iv) HCl·aq. (25%), <sup>n</sup>PrOH, 90 °C, 6 h, 98%. (v) CH<sub>2</sub>(CN)<sub>2</sub>, NH<sub>4</sub>OAc, 1,2-DCE-EtOH, 60 °C, 16h, 94%.

**2-(3-Hexyl-5-iodo-2-thienyl)-[1,3]dioxolane (11).** To a solution of 2-(3-hexyl-2-thienyl)-[1,3]dioxolane **10** (24.2 g, 100.6 mmol) in 150 ml THF was added *n*-butyl lithium (72 ml, 115 mmol, 1.6 molar in *n*-hexane), at -80 °C. After maintaining the temperature for about 20 minutes a solution of iodine (30.46 g, 115 mmol) in 150 ml THF was added. A pale yellow precipitate formed and the mixture became viscous. The mixture was stirred for further 45 minutes. The temperature was increased slowly to -15 °C, the cooling bath was removed and the reaction mixture stirred at room temperature for 14 hrs. The mixture was quenched with water, NH<sub>4</sub>Cl (1M) solution and aqueous NaHSO<sub>3</sub> solution. The aqueous phase was extracted twice with diethyl ether and the combined organic layers were washed successively with water, satd. NaHCO<sub>3</sub> solution, and brine. Removal of the solvent furnished a crude product, which was purified by column chromatography on silica with petroleum ether-DCM (1:1,v/v). Yield: 30.05 g (82%) of pale yellow oil; <sup>1</sup>H-NMR (CDCl<sub>3</sub>, 400 MHz): δ = 0.88 (t, *J* = 6.8 Hz, 3H, CH<sub>3</sub>), 1.29 (m, 6H, CH<sub>2</sub>), 1.55 (tt, *J* = 7.6 Hz, 2H, CH<sub>2</sub>), 2.58 (t, *J* = 7.8 Hz, 2H, CH<sub>2</sub>), 3.92-4.02 (m, 2H, OCH<sub>2</sub>), 4.05-4.15 (m, 2H, CH<sub>2</sub>O), 6.06 (s, 1H, CH), 6.99 (s, 1H, Th-*H*). <sup>13</sup>C-NMR (CDCl<sub>3</sub>, 100 MHz): δ = 14.1, 22.5, 28.1, 29.0, 30.7, 31.6, 65.2, 73.8, 98.6, 138.8, 140.8, 143.5. Elemental analysis for C<sub>13</sub>H<sub>19</sub>IO<sub>2</sub>S: calcd. C, 42.63; H, 5.23; S, 8.75%; found: C, 42.73; H, 5.29; S, 8.67.

**3-Hexyl-5-iodothiophene-2-carbaldehyde (12).** A mixture of **11** (5.0 g, 14 mmol) and hydrochloric acid (25 wt%, 50 ml) was heated to 90 °C under vigorous stirring. After 5 hrs the mixture is cooled and the phases separated. The aqueous phase was extracted twice with pentane. The combined organic layers were washed with water and satd. NaHCO<sub>3</sub>, dried over Na<sub>2</sub>SO<sub>4</sub>. After removal of the solvent the dark brown oil was passed over silica using DCM – petrol ether (9:1, v/v) to obtain the desired aldehyde **12** as a pale yellow oil in 4.31 g (98%). The analytical data match with the known literature values.<sup>5</sup>

**2-[3-Hexyl-5-iodo-2-thienyl(methane-1-yl-1-ylidene)]malononitrile (7).** To a solution of **12** (4.31 g, 13 mmol) in 1,2-dichloroethane (50 mL), a solution of malonodinitrile (1.33 g, 20 mmol) and ammonium acetate (0.17 g, 2.2 mmol) in 50 ml ethanol was added and the reaction mixture was stirred at 65 °C for 16 hrs. After cooling to room temperature the product precipitated. The solid was filtered with suction, washed with ethanol and dried under vacuum. Yield: 4.37 g (88%) of a red solid. M.p. 154-155 °C. <sup>1</sup>H-NMR (CDCl<sub>3</sub>, 400 MHz): δ = 0.90 (t, *J* = 6.8 Hz, 3H, CH<sub>3</sub>), 1.31 (m, 6H, CH<sub>2</sub>), 1.59 (tt, *J* = 7.6 Hz, 2H, CH<sub>2</sub>), 2.72 (t, *J* = 7.9 Hz, 2H, CH<sub>2</sub>), 7.26 (s, 1H, Th-*H*), 7.80 (s, 1H, CH). <sup>13</sup>C-NMR (CDCl<sub>3</sub>, 100 MHz): δ = 14.0, 22.5, 28.7, 28.9, 31.3, 31.4, 76.9, 89.6, 113.4, 114.3, 136.0, 140.1, 147.1, 156.5. IR (KBr, cm<sup>-1</sup>): 2928 (s, CH assym.), 2858 (s, CH sym.), 2227/ 2214 (s/m, CN),

1571 (s, CC). Elemental analysis for  $C_{14}H_{15}IN_2S$ : calcd. C, 45.42; H, 4.08; N, 7.57; S, 8.66%; found: C, 45.57; H, 4.02; N, 7.59; S, 8.50%.

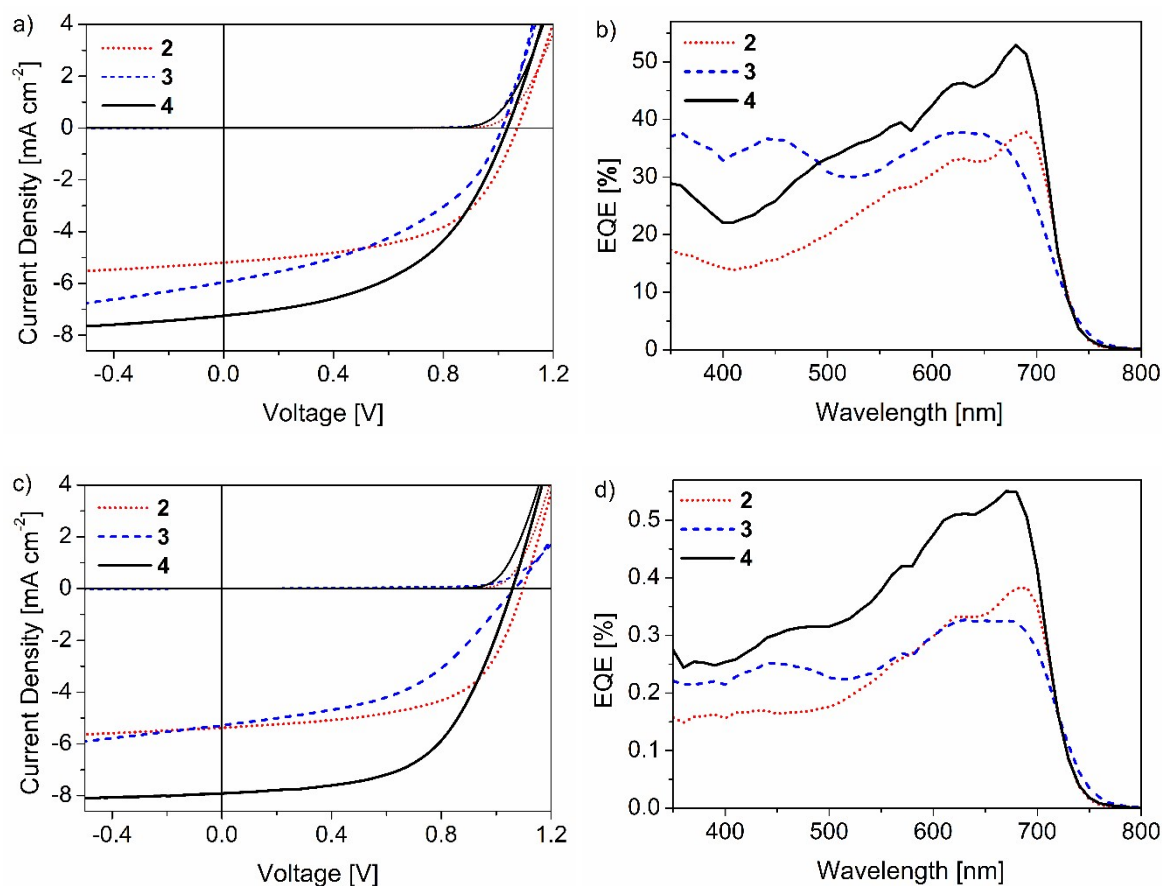

**Figure S1.** Comparison of the  $J$ - $V$  and EQE curves of the best solar cell performance of devices with the optimized structure: (a and b) ITO|PEDOT:PSS|Donor:PC<sub>61</sub>BM|LiF|Al. (c and d) ITO|V<sub>2</sub>O<sub>5</sub>|Donor:PC<sub>61</sub>BM|LiF|Al.

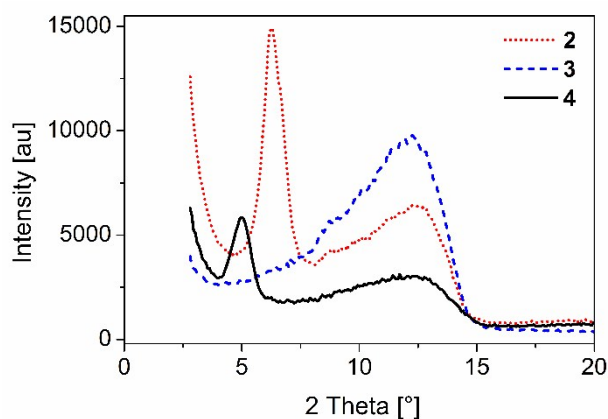

**Figure S2.** 1D-GIXRD patterns of oligomer:PC<sub>61</sub>BM blends deposited from  $\text{CHCl}_3$  on PEDOT:PSS coated glass substrate.

**Table S1.** Photovoltaic performance of DTP-4:PC<sub>61</sub>BM using different concentration of PDMS additive. D:A ratio was 1:2. Device structure: ITO|V<sub>2</sub>O<sub>5</sub>|Donor:PC<sub>61</sub>BM|LiF|Al.

| Donor | HTL spin speed | Additive [%] | Soln conc. [mg/mL] | T [°C]<br>Soln/Sub | $J_{sc}$ [mA cm <sup>-2</sup> ] | $V_{oc}$ [V] | FF   | PCE [%] |
|-------|----------------|--------------|--------------------|--------------------|---------------------------------|--------------|------|---------|
| 4     | 5750           | -            | 15                 | 60/60              | 7.9                             | 1.06         | 0.57 | 4.8     |
| 4     | 5750           | 0.1          | 15                 | 60/60              | 7.6                             | 1.06         | 0.64 | 5.2     |
| 4     | 5750           | 0.2          | 15                 | 60/60              | 7.9                             | 1.07         | 0.63 | 5.3     |
| 4     | 5750           | 0.4          | 15                 | 60/60              | 7.3                             | 1.06         | 0.61 | 4.7     |

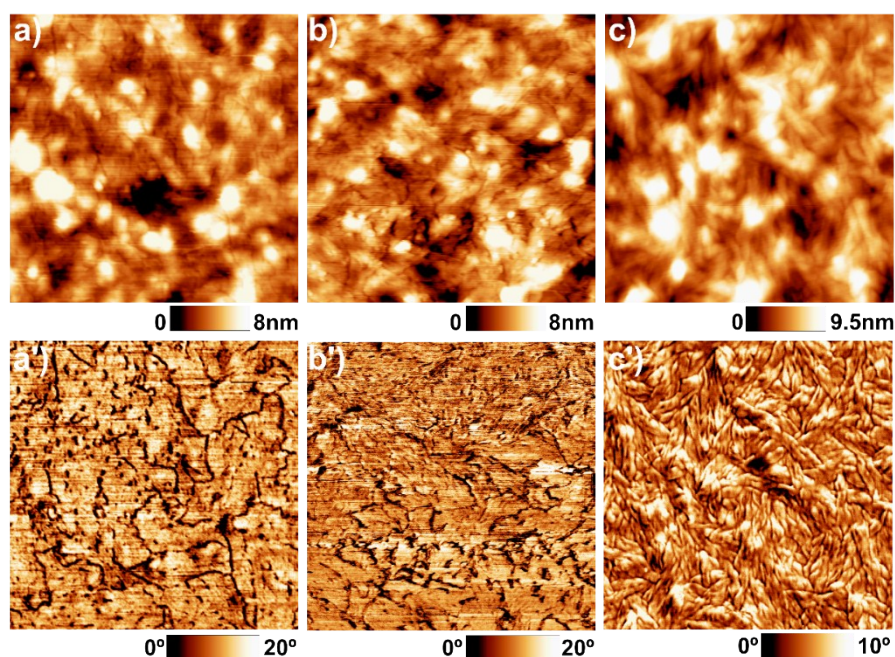

**Figure S3.** AFM height (a-c) and phase (a'-c') images of samples with 4:PC<sub>61</sub>BM spin-coated on (a and a') ITO|PEDOT:PSS| from CHCl<sub>3</sub>, (b and b') ITO|V<sub>2</sub>O<sub>5</sub>| from CHCl<sub>3</sub> and (c and c') ITO|V<sub>2</sub>O<sub>5</sub>| from CHCl<sub>3</sub>/PDMS. Image size: 1 x 1  $\mu$ m.

## References

1. D.J. Turner, R. Anémian, P.R. MacKie, D.C. Cupertino, S.G. Yeates, M.L. Turner, A.C. Spirey, *Org. Biomol. Chem.* **2007**, *5*, 1752-1763.
2. H. Keng, E. Lim, Y.K. Jung, J.-H. Park, H.-K. Shim, C.E. Park, D.H. Lee, I.-N. Kang, T. Ahn, M.H. Yi, *J. Mater. Chem.* **2008**, *18*, 1895-1902.
3. a) J. Ding, Z. Li, Z. Cui, G.P. Robertson, N. Song, X. Du, L. Scoles, *J. Polym. Sci. A, Polym. Chem.* **2011**, *49*, 3374-3386; b) S. Barriga, P. Fuertes, C.F. Marcos, O.A. Rahitin, T. Torroba, *J. Org. Chem.* **2002**, *67*, 6439-6448; c) A. Anthonysamy, Y. Lee, J.K. Kim, B. Karunagaran, V. Ganapathy, S.-W. Rhee, S. Karthikeyan, K.S. Kim, M.J. Ko, N.-G. Park, M.-J. Ju, *J. Mater. Chem.* **2011**, *21*, 12389-12397.
4. P. Shen, Y. Tang, S. Jiang, H. Chen, X. Zheng, X. Wang, B. Zhao, S. Tan, *Org. Elect.* **2011**, *12*, 125-135.
5. N. Masuda, S. Tanba, A. Sugie, D. Monguchi, N. Koumura, K. Hara, A. Mori, *Org. Lett.* **2009**, *11*, 2297-2300.
